# Supplementary material
Source: PubMed Central journal article supplement (PMC3636705)
Supplement: supp_0022155413478612_10.1369_0022155413478612_Supplemental_Material.pdf [file supp_0022155413478612_10.1369_0022155413478612_Supplemental_Material.pdf]

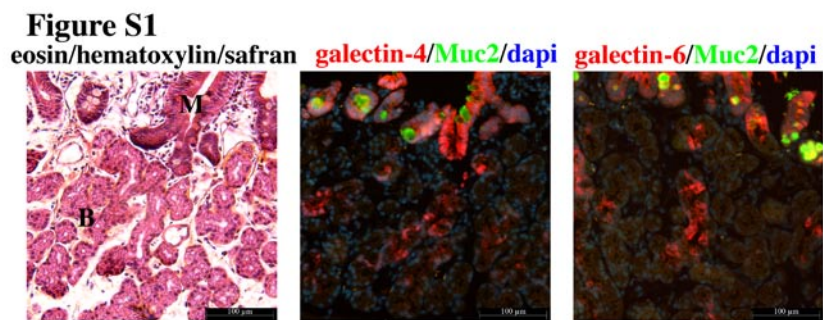

section through the anteriormost part of the duodenum showing the Brunner's gland (B) and mucosa (M).

**Figure S2**

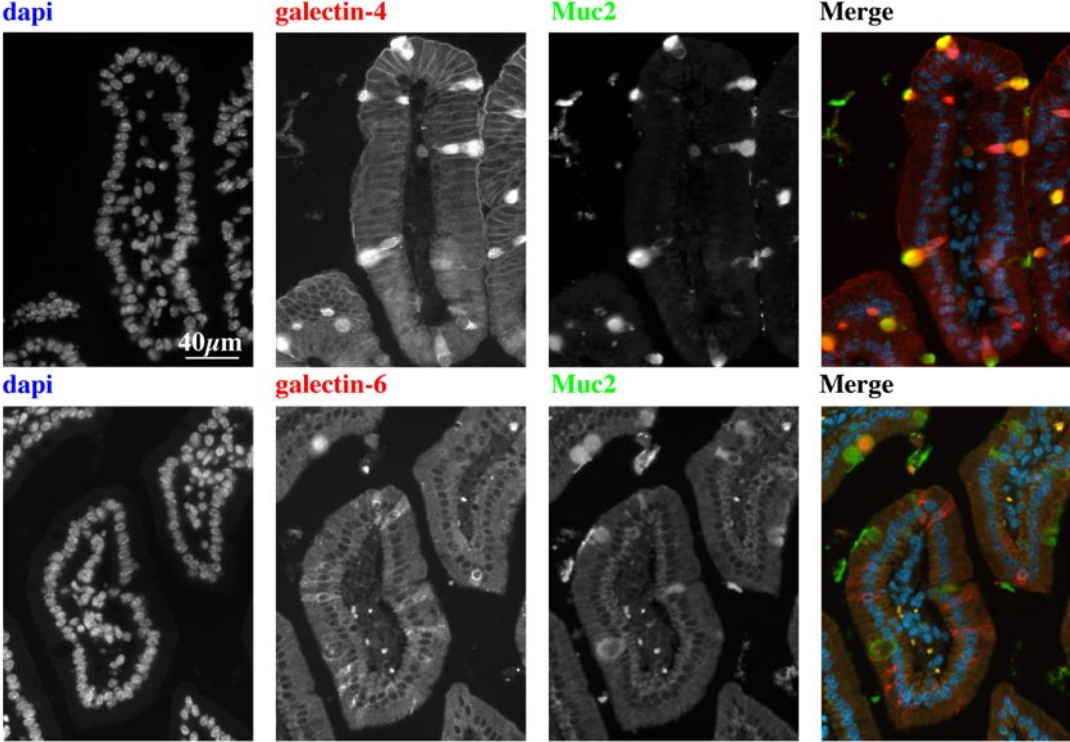

Expression of galectin-4 and -6 in the duodenum shown as single and composite exposures.

### Figure S3

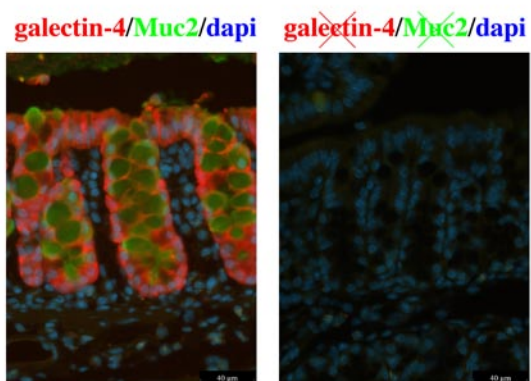

Expression of galectin-4 and Muc2 in the colon of 129/Sv mice (left column) compared with a similar section without primary antibody (right column).
